# Supplementary material for: Filamentous virus decoration with gold nanoparticles: global fingerprints of bionanocomposites acquired with SERS
Source: Royal Society of Chemistry journal article supplement (doi:10.1039/c4ra10656c), 2014-01-01
Supplement: c4ra10656c1.pdf [file c4ra10656c1.pdf]

**Electronic Supplementary Information for:**

**Filamentous virus decoration with gold nanoparticles: Global fingerprints of bionanocomposites acquired with SERS**

Danai Montalvan-Sorrosal<sup>1</sup>, José Luis González-Solis<sup>2</sup>, Jaime Mas-Oliva<sup>3</sup>, and Rolando Castillo\*<sup>1</sup>

<sup>1</sup>Instituto de Física, Universidad Nacional Autónoma de México  
P. O. Box. 20-364, México D. F. 01000.

<sup>2</sup>Centro Universitario de los Lagos, Universidad de Guadalajara  
Av. Enrique Díaz de León 1144, Col. Paseo de la Montaña,  
CP 47460, Lagos de Moreno, Jalisco, México

<sup>3</sup>Instituto de Fisiología Celular, Universidad Nacional Autónoma de México  
P. O. Box 70-243, D. F., México 04510

---

\* To whom correspondence must be addressed  
e-mail: rolandoc@fisica.unam.mx

This supporting information presents:

- a) Electronic micrographs of aggregated wt fd virus with a AuNP at the tip end.
- b) Average standard Raman Spectra for wt fd virus and fd-cys virus.
- c) The principal features of SERS spectra obtained with PCA for the different kinds of viruses and synthesized nanobiocomposites.
- d) The assignment of functional groups to the relevant peaks in the spectra that were assigned based on standard databases for Raman spectra.<sup>1</sup>

## Notation

|                  |                  |                            |
|------------------|------------------|----------------------------|
| s, strong        | vib, vibration   | Aq. sln., aqueous solution |
| p, polarized     | sym, symmetric   | unsat, unsaturated         |
| asym, asymmetric | vs, very strong  | w, weak                    |
| str, stretching  | def, deformation | v, variable                |
| m, medium        | sat, saturated   |                            |

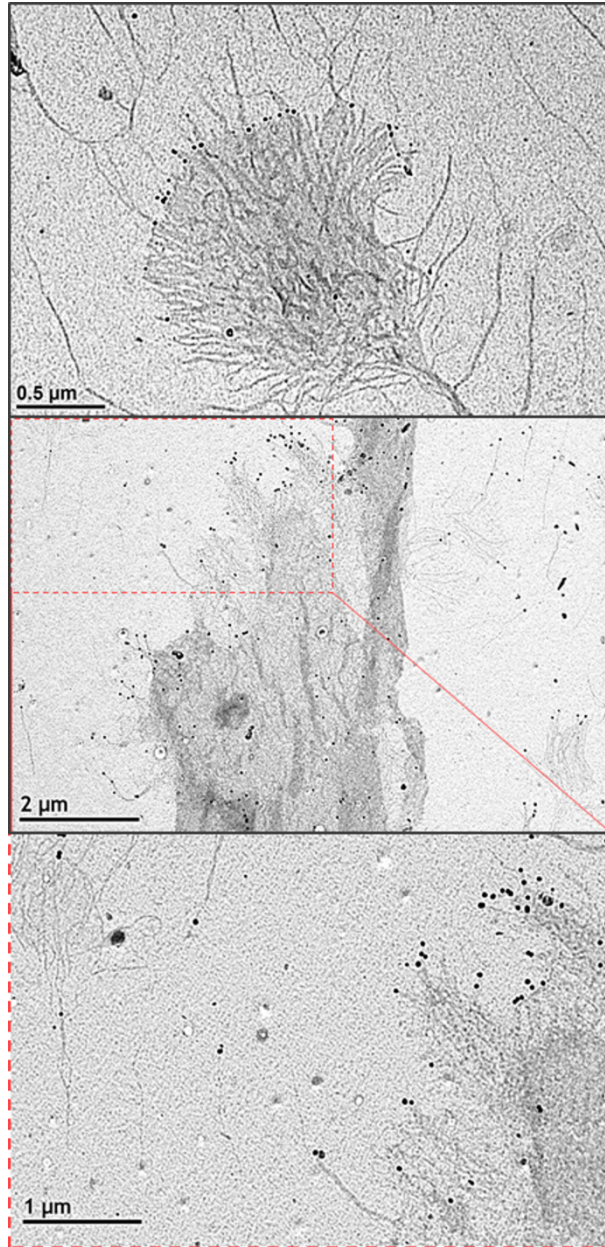

Fig S1 Electronic micrographs of aggregated wt fd virus with a AuNP at the tip end.

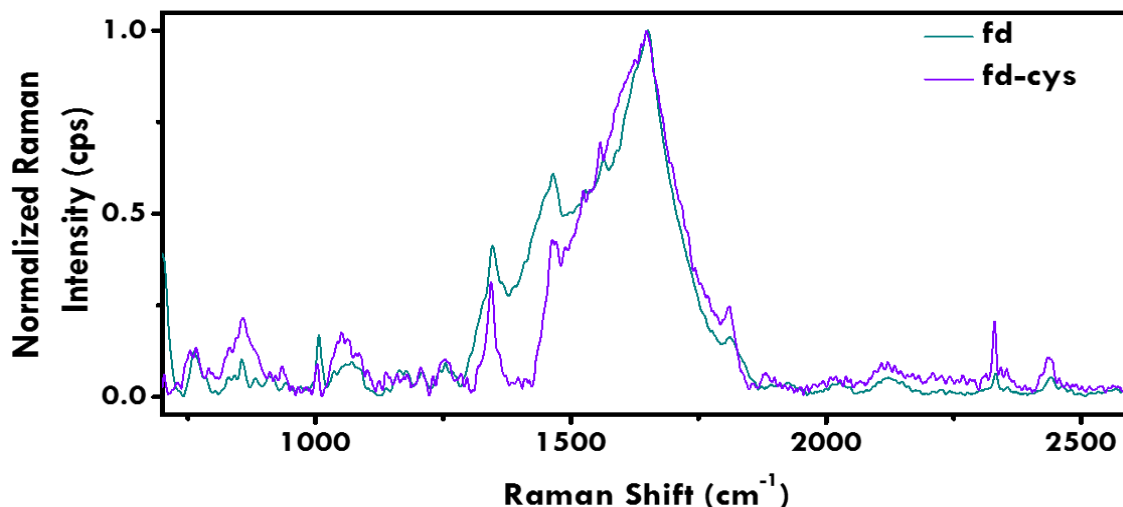

Fig. S2. Average standard Raman Spectra for wt fd virus and fd-cys virus. As it can be observed, both spectra are very similar.

Table S1. Principal differences between wt fd virus and fd-cys viruses obtained with principal component analysis.

| Raman shift (cm <sup>-1</sup> ) | Type of mode                                          | Tentative functional groups assignment          |
|---------------------------------|-------------------------------------------------------|-------------------------------------------------|
| 721                             | <i>s, p</i> asym CNC str                              | tertiary amides                                 |
|                                 | P=S str                                               | P=S                                             |
| 751                             | <i>s</i> , amide VII                                  | primary thioamides                              |
|                                 | <i>m, p</i> skeletal vib                              | branched alkanes                                |
|                                 | <i>m-s, p</i> asym CSC str                            | CH <sub>3</sub> SCH <sub>2</sub> -              |
|                                 | <i>m, p</i> O-C=O in-plane def                        | formates                                        |
|                                 | <i>m-s</i> , C <sub>4</sub> O skeletal vib and CO def | tertiary alcohols                               |
|                                 | <i>m-s</i> sym skeletal vib                           | tertiary butyl groups                           |
| 889                             | <i>m-s, p</i> C-N str                                 | saturated primary and secondary nitro compounds |
|                                 | <i>m</i> , CH def                                     | <i>cis</i> - CH=CH-                             |
|                                 | <i>m-s</i> , skeletal vib                             | straight chain alkanes                          |
|                                 | <i>m-s</i> , sym COC str                              | aliphatic ethers                                |
|                                 | <i>s, p</i> CCO str                                   | primary and secondary alcohols                  |
| 952                             | <i>s, p</i> sym COC str                               | ethers                                          |
|                                 | <i>w</i> CH def                                       | vinyl compounds -CH=CH <sub>2</sub>             |
|                                 | <i>vs</i> ring vib                                    | polysubstituted pyridines                       |
|                                 | <i>m-s, p</i> C-N str                                 | saturated primary and secondary nitro compounds |
| 1009                            | <i>m-s</i> , C=C, C=N str                             | pyrimidines                                     |
|                                 | <i>m-w</i> , P-H def                                  | P-H                                             |
|                                 | <i>s, p</i> CH in -plane def                          | <i>ortho</i> disubstituted benzenes             |
|                                 | <i>s</i> , CH <sub>2</sub> /CH wagging vib            | cyclopropil compounds                           |
|                                 | <i>vs</i>                                             | 1,3,5-Trisubstituted benzenes                   |
|                                 | <i>s, p</i> sym COC str                               | ethers                                          |
|                                 | <i>m-s</i> , C-C vib                                  | -OC(CH <sub>3</sub> ) <sub>3</sub>              |
| 1057                            | <i>s, p</i> sym COC str                               | ethers                                          |
|                                 | <i>m-w</i> , P-H def                                  | P-H                                             |

|      |                                                      |                                                                 |
|------|------------------------------------------------------|-----------------------------------------------------------------|
|      | <i>m-s</i> CCC str                                   | straight chain alkanes                                          |
|      | <i>m</i> CO-C str                                    | formates                                                        |
|      | <i>s, p</i> CH in-plane def                          | orthodisubstituted benzenes                                     |
|      | <i>m-s</i> ring vib                                  | 2-monosubstituted pyridines                                     |
| 1082 | <i>m-s</i> , C-N str                                 | aliphatic amines                                                |
|      | <i>m-w</i> , P-H def                                 | P-H                                                             |
|      | <i>s, p</i> sym C=C=C str                            | allenes                                                         |
|      | <i>m-s</i> , CCC str                                 | straight chain alkanes                                          |
|      | <i>m-w</i> , <i>p</i> sym CNC str                    | saturated aliphatic ethers                                      |
|      | <i>s, p</i> sym COC str                              | ethers                                                          |
|      | <i>s</i> , ring vib                                  | ring =C-O-C=                                                    |
| 1207 | <i>s</i> , amide III band                            | trans secondary amides                                          |
|      | <i>s, p</i> N=N=N sym str                            | azides                                                          |
|      | <i>s</i> , CH def                                    | cis (sat) CH=CH (sat)                                           |
|      | <i>m</i> , CC <sub>3</sub> vib                       | t-butyl groups                                                  |
|      | <i>m-w</i> , P=O str                                 | P=O str                                                         |
|      | <i>m-s</i> , C-N str                                 | Aliphatic amines                                                |
|      | <i>m-s</i> C-O-O str                                 | formates                                                        |
| 1226 | <i>m-s</i> , C-N str                                 | aliphatic amines                                                |
|      | <i>m-w</i> , P=O str                                 | P=O str                                                         |
|      | <i>s</i> , CH def                                    | <i>cis</i> (sat) CH=CH (sat)                                    |
|      | <i>m</i> , CC <sub>3</sub> vib                       | t-butyl groups                                                  |
|      | <i>m-s</i> , ring vib                                | <i>p</i> -disubstituted benzenes                                |
|      | <i>m-s</i> , CO-O str                                | acetates                                                        |
| 1238 | <i>s, p</i> N=N=N sym str                            | azides                                                          |
|      | <i>s</i> , amide III band                            | trans secondary amides                                          |
|      | <i>s</i> , CH def                                    | cis (sat) CH=CH (sat)                                           |
|      | <i>s, p</i> sym                                      | nitrate -O-NO <sub>2</sub>                                      |
|      | <i>m</i> , CC <sub>3</sub> vib                       | t-butyl groups                                                  |
| 1274 | <i>s</i> , amide III                                 | <i>trans</i> secondary amides                                   |
|      | <i>s, p</i> N=N=N sym str                            | azides                                                          |
|      | <i>s</i> , CH def                                    | <i>trans</i> (sat) CH=CH (sat) and <i>cis</i> (sat) CH=CH (sat) |
|      | <i>m</i> , CC <sub>3</sub> vib                       | t-butyl groups                                                  |
| 1330 | <i>m-s, p</i> sym CO <sub>2</sub> <sup>-</sup> str   | carboxylate ions                                                |
|      | <i>m-s</i> , CH in-plane rocking                     | aldehydes                                                       |
|      | <i>m-w</i> , OH def                                  | phenols                                                         |
|      | <i>s-m</i> , asym N-C-N str                          | ureas                                                           |
|      | <i>w</i> , CH in-plane def                           | =C=CH (hydrocarbons)                                            |
|      | <i>s</i> , C-N amide III band                        | cis form secondary amides                                       |
|      | <i>w</i> , sym CH <sub>3</sub> def                   | PCH <sub>3</sub>                                                |
|      | <i>s, p</i> N=N=N sym str                            | azides                                                          |
| 1370 | <i>s</i> , CH def                                    | cis (sat) CH=CH (sat)                                           |
|      | <i>m-s</i> , CH in-plane rocking                     | aldehydes                                                       |
|      | <i>m-s, p</i> sym CO <sub>2</sub> <sup>-</sup> str   | aromatic acid salts and carboxylate ions                        |
|      | <i>m-s, p</i> CH <sub>2</sub> def                    | vinyls-CH=CH <sub>2</sub>                                       |
| 1407 | <i>s</i> , amide III band                            | primary thioamides                                              |
|      | <i>w</i> , asym CH <sub>3</sub> def                  | -PCH <sub>3</sub>                                               |
|      | <i>m-s</i> , CH in-plane rocking                     | aldehydes                                                       |
|      | <i>m-s, p</i> sym CO <sub>2</sub> <sup>-</sup> str   | aromatic acid salts and carboxylate ions                        |
|      | <i>m-s, p</i> CH <sub>2</sub> def                    | vinyls-CH=CH <sub>2</sub>                                       |
| 1426 | <i>m-w</i> , OCH <sub>3</sub> , OCH <sub>2</sub> def | -OCH <sub>3</sub> OCH <sub>2</sub> -                            |
|      | <i>s, p</i> N=C=O sym str                            | isocyanates -N=C=O                                              |
|      | <i>w</i> , asym CH <sub>3</sub> def                  | -PCH <sub>3</sub>                                               |
|      | <i>m-s</i> , CH in-plane rocking                     | aldehydes                                                       |
|      | <i>m-s, p</i> sym CO <sub>2</sub> <sup>-</sup> str   | aromatic acid salts and carboxylate ions                        |
|      | <i>m-s, p</i> CH <sub>2</sub> def                    | vinyls-CH=CH <sub>2</sub>                                       |

|      |                                                     |                                                                                                                               |
|------|-----------------------------------------------------|-------------------------------------------------------------------------------------------------------------------------------|
| 1467 | <i>s</i> , amide III band                           | primary thioamides                                                                                                            |
|      | <i>m-w</i> , OCH <sub>3</sub> , CH <sub>2</sub> def | n-Alkanes                                                                                                                     |
|      | <i>m-w</i> , CH <sub>2</sub> sym def                | cyclopropyl compounds and POCH <sub>3</sub>                                                                                   |
| 1516 | <i>w</i> , NH def                                   | secondary amines                                                                                                              |
|      | <i>m-w</i> , asym NO <sub>2</sub> str               | aromatic nitro compounds                                                                                                      |
|      | <i>w</i> , NH <sub>3</sub> <sup>+</sup> sym def     | -NH <sub>3</sub> <sup>+</sup>                                                                                                 |
| 1536 | <i>w</i> , NH def                                   | secondary amines                                                                                                              |
|      | <i>w</i> , amide II                                 | ureas                                                                                                                         |
|      | <i>w</i> , CO <sub>2</sub> <sup>-</sup> asym str    | aromatic acid salts                                                                                                           |
| 1607 | <i>s</i> , C=C str                                  | C=C conjugated with C=C or C=O and <i>cis</i> (unsat) -CH=CH-unsat                                                            |
|      | <i>w</i> , NH <sub>2</sub> scissoring               | primary amines                                                                                                                |
|      | <i>m</i> , C=O str                                  | enol from diketones                                                                                                           |
|      | <i>s</i> , several bands ring C=C str               | benzene derivatives                                                                                                           |
|      | <i>w</i> , NH <sub>3</sub> <sup>+</sup> asym str    | -NH <sub>3</sub> <sup>+</sup>                                                                                                 |
|      | <i>w</i> , CO <sub>2</sub> <sup>-</sup> asym str    | aromatic acid salts                                                                                                           |
|      | <i>w</i> , amide III band                           | ureas                                                                                                                         |
| 1624 | <i>w-m</i> , amide I and II                         | primary and secondary amides                                                                                                  |
|      | <i>w</i> , NH <sub>2</sub> scissoring               | primary amines                                                                                                                |
|      | <i>s</i> , C=C str                                  | <i>trans</i> (unsat) -CH=CH-(unsat) and C=C conjugated with C=C, C=O or with aryl                                             |
|      | <i>s</i> , several bands ring C=C str               | benzene derivatives                                                                                                           |
|      | <i>m</i> , C=O str                                  | enol from diketones                                                                                                           |
|      | <i>w</i> , CO <sub>2</sub> <sup>-</sup> asym str    | Carboxylic acid salts                                                                                                         |
| 1692 | <i>w-m</i> , C=O str                                | α,β-unsat. aliphatic carboxylic acids (as dimer), aryl aldehydes, thiol acids, -COSH and α,β-unsat. ketones <i>s-cis</i> form |
| 1767 | <i>w-m</i> , C=O str                                | secondary amides                                                                                                              |
|      | <i>m, p</i> C=O str                                 | Aryl and alfa, beta-unsat acid chlorides                                                                                      |
| 1808 | <i>m-w</i> , <i>p</i> C=O str                       | sat. Aliphatic acid chlorides and β, γ unsat γ-lactones (unsat 5 membered ring)                                               |
| 1925 | <i>v</i> , asym C=C=C str                           | Allenes and symetrically disubstituted allenes                                                                                |
| 2010 | <i>m-s, p</i> br, asym NCS str                      | isothiocyanates -N=C=S                                                                                                        |
| 2041 | <i>m-s, p</i> br, asym NCS str                      | isothiocyanates -N=C=S                                                                                                        |
| 2086 | <i>m-s, p</i> br, asym NCS str                      | isothiocyanates -N=C=S                                                                                                        |
| 2122 | <i>v</i> , asym -N=C=C str                          | Ketenimines >C=N=N-                                                                                                           |
|      | <i>m-s, p</i> asym str                              | azides -N=N=N                                                                                                                 |
|      | <i>v</i>                                            | ketenes >C=C=O                                                                                                                |
| 2139 | <i>v</i> , asym -N=C=C str                          | Ketenimines >C=N=N-                                                                                                           |
|      | <i>m-s, p</i> asym str                              | azides -N=N=N                                                                                                                 |
| 2161 | <i>v</i> , asym -N=C=C str                          | Ketenimines >C=N=N-                                                                                                           |
|      | <i>v</i>                                            | ketenes >C=C=O                                                                                                                |
|      | <i>m-s, p</i> asym str                              | azides -N=N=N                                                                                                                 |
|      | <i>m-s, p</i> br, asym NCS str                      | isothiocyanates -N=C=S                                                                                                        |
| 2211 | <i>m-s</i> , CN str                                 | P-CN                                                                                                                          |
| 2275 | <i>m-w</i> , P-H str                                | P-H                                                                                                                           |
| 2292 | <i>m-w</i> , P-H str                                | P-H                                                                                                                           |
| 2335 | <i>m-w</i> , P-H str                                | P-H                                                                                                                           |
| 2361 | <i>m-w</i> , P-H str                                | P-H                                                                                                                           |
| 2373 | <i>m-w</i> , P-H str                                | P-H                                                                                                                           |
| 2479 | <i>m-w</i> , P-H str                                | P-H                                                                                                                           |
| 2494 | <i>m-w</i> , P-H str                                | P-H                                                                                                                           |
| 2517 | <i>s, p</i> S-H str                                 | <b>Meraptans, aliphatic thiols and thiophenols</b>                                                                            |
|      | <i>s, p</i> S-H str                                 | <b>CH<sub>2</sub>SH</b>                                                                                                       |
| 2585 | <i>s, p</i> S-H str                                 | <b>Meraptans, aliphatic thiols, thiophenols and CH<sub>2</sub>SH</b>                                                          |

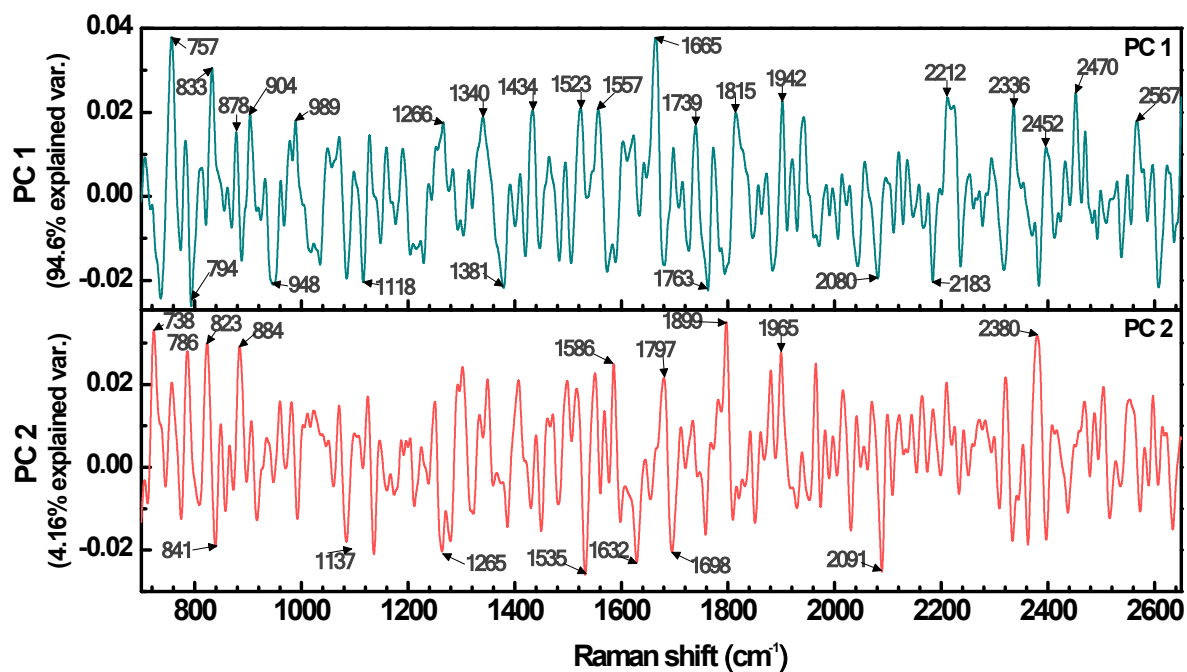

Fig. S3. The first and second principal components as given by PCA versus Raman shift when fd-cys-Au virus (nanowires-like) and the negative control (non-reduced fd-cys viruses plus AuNPs) SERS spectra are compared. Peaks with arrows correspond to the main differences between both spectra

Table S2. Modes and functional groups assignment for the principal differences between fd-cys-Au and negative control (non-reduced fd-cys plus AuNPs) obtained with PCA and pointed out in Fig.S3.

| Raman shift (cm <sup>-1</sup> ) | Type of mode                                          | Tentative functional groups assignment |
|---------------------------------|-------------------------------------------------------|----------------------------------------|
| 738                             | <i>s</i> , C-S str                                    | aliphatic sulphides and disulphides    |
|                                 | <i>m</i> , NO <sub>2</sub> def                        | nitroamines N-NO <sub>2</sub>          |
|                                 | <i>m-s</i> , <i>p</i> asym CSC str                    | CH <sub>3</sub> SCH <sub>2</sub> -     |
|                                 | <i>m</i> , <i>p</i> O-C=O in-plane def                | formates                               |
|                                 | <i>m-s</i> , sym skeletal vib                         | tertiary butyl groups                  |
| 757                             | <i>s</i> , <i>p</i> asym CNC str                      | tertiary amides                        |
|                                 | <i>s</i> , amide I                                    | thioamides                             |
|                                 | <i>s</i> , amide VII                                  | primary thioamides                     |
|                                 | P=S str                                               | P=S                                    |
|                                 | <i>m</i> , <i>p</i> skeletal vib                      | branched alkanes                       |
|                                 | <i>m-s</i> , ring vib                                 | <i>para</i> disubstituted benzenes     |
|                                 | <i>m-s</i> , <i>p</i> asym CSC str                    | CH <sub>3</sub> SCH <sub>2</sub> -     |
|                                 | <i>m</i> , <i>p</i> O-C=O in-plane def                | formates                               |
| 786                             | <i>m-s</i> , sym skeletal vib                         | tertiary butyl groups                  |
|                                 | <i>s</i> , <i>p</i> asym CNC str                      | tertiary amides                        |
|                                 | POP str                                               | P-O-P                                  |
|                                 | P=S str                                               | P=S                                    |
|                                 | <i>s</i> , amide I band                               | thioamides                             |
|                                 | <i>m</i> , <i>p</i> skeletal vib                      | branched alkanes                       |
|                                 | <i>m-s</i> , ring vib                                 | <i>para</i> disubstituted benzenes     |
| 794                             | <i>m-s</i> , C <sub>4</sub> O skeletal vib and Co def | tertiary alcohols                      |
|                                 | <i>s</i> , <i>p</i> asym CNC str                      | tertiary amides                        |
|                                 | POP str                                               | P-O-P                                  |
|                                 | P=S str                                               | P=S                                    |
|                                 | <i>s</i> , amide I band                               | thioamides                             |
|                                 | <i>m</i> , <i>p</i> skeletal vib                      | branched alkanes                       |
| 823                             | <i>m-s</i> , C-S str                                  | secondary thioamides                   |
|                                 | <i>m-s</i> , skeletal vib                             | straight chain and branched alkanes    |
|                                 | <i>s</i> , <i>p</i> CCO str                           | primary and secondary alcohols         |
|                                 | <i>m-s</i> , sym COC str                              | aliphatic and vinyl ethers             |
|                                 | <i>s</i> , <i>p</i> asym CNC str                      | tertiary amides                        |
|                                 | POP str                                               | P-O-P                                  |
|                                 | P=S str                                               | P=S                                    |
|                                 | <i>m-s</i> , ring vib                                 | <i>para</i> disubstituted benzenes     |
| 833                             | <i>m-s</i> , C <sub>3</sub> O skeletal vib            | secondary alcohols                     |
|                                 | <i>m-s</i> , C-S str                                  | secondary thioamides                   |
|                                 | <i>s</i> , <i>p</i> asym CNC str                      | tertiary amides                        |
|                                 | <i>s</i> , amide I                                    | thioamides                             |
|                                 | <i>s</i> , <i>p</i> CCO str                           | primary and secondary alcohols         |
|                                 | <i>m-s</i> , sym COC str                              | aliphatic and vinyl ethers             |
|                                 | POP str                                               | P-O-P                                  |
|                                 | P=S str                                               | P=S                                    |
|                                 | <i>m-s</i> , skeletal vib                             | straight and branched chain alkanes    |
| 841                             | <i>m-s</i> , C <sub>3</sub> O skeletal vib            | secondary alcohols                     |
|                                 | <i>m-s</i> , ring vib                                 | <i>para</i> disubstituted benzenes     |
|                                 | <i>m-s</i> , C-S str                                  | secondary thioamides                   |
|                                 | <i>m-s</i> , skeletal vib                             | straight chain alkanes                 |
|                                 | <i>s</i> , <i>p</i> CCO str                           | primary and secondary alcohols         |
|                                 | <i>m-s</i> , sym COC str                              | aliphatic and vinyl ethers             |
| 841                             | <i>s</i> , <i>p</i> asym CNC str                      | tertiary amides                        |
|                                 | POP str                                               | P-O-P                                  |



|      |                                                    |                                                 |
|------|----------------------------------------------------|-------------------------------------------------|
|      | P=S str                                            | P=S                                             |
|      | <i>s</i> amide I band                              | thioamides                                      |
| 878  | <i>m-s, p</i> C-N str                              | saturated primary and secondary nitro compounds |
|      | <i>m-s, C-S</i> str                                | secondary thioamides                            |
|      | <i>m, CH</i> def                                   | <i>cis</i> CH=CH-                               |
|      | <i>m-s, skeletal</i> vib                           | straight chain alkanes                          |
|      | <i>s, p</i> CCO str                                | primary and secondary alcohols                  |
|      | <i>m-s, sym</i> COC str                            | aliphatic ethers                                |
| 884  | <i>m-s, skeletal</i> vib                           | straight chain alkanes                          |
|      | <i>s, p</i> CCO str                                | primary and secondary alcohols                  |
|      | <i>m-s, sym</i> COC str                            | aliphatic ethers                                |
|      | <i>m-s, p</i> C-N str                              | saturated primary and secondary nitro compounds |
|      | <i>m, CH</i> def                                   | <i>cis</i> CH=CH-                               |
|      | <i>m-s, C-S</i> str                                | secondary thioamides                            |
| 904  | <i>m-s, p</i> C-N str                              | saturated primary and secondary nitro compounds |
|      | <i>m, CH</i> def                                   | <i>cis</i> CH=CH-                               |
| 948  | <i>s, p</i> sym COC str                            | ethers                                          |
|      | <i>vs</i> ring vib                                 | polysubstituted pyridines                       |
|      | <i>w</i> CH def                                    | vinyl compounds -CH=CH <sub>2</sub>             |
| 989  | <i>m-s, p</i> C-N str                              | saturated primary and secondary nitro compounds |
|      | <i>m-s, C=C, C=N</i> str                           | pyrimidines                                     |
|      | <i>s, ring</i> vib                                 | pyridines                                       |
|      | <i>m-w, P-H</i> def                                | P-H                                             |
|      | <i>s, p</i> sym COC str                            | ethers                                          |
|      | <i>s, CH<sub>2</sub>/CH</i> wagging vib            | cyclopropyl compounds                           |
|      | <i>m, CH</i> def                                   | <i>trans</i> CH=CH- and <i>cis</i> CH=CH-       |
| 1118 | <i>m-w, P=O</i> str                                | P=O str                                         |
|      | <i>m-s, C-N</i> str                                | Aliphatic amines                                |
|      | <i>m-w, P-H</i> def                                | P-H                                             |
|      | <i>w, asym</i> C-O-C str                           | saturated aliphatic amines                      |
|      | <i>s, p</i> sym COC str                            | ethers                                          |
|      | P-H                                                |                                                 |
| 1137 | <i>m-w, P-H</i> def                                |                                                 |
|      | <i>w, asym</i> C-O-C str                           | saturated aliphatic amines                      |
|      | <i>s, p</i> sym COC str                            | ethers                                          |
| 1265 | <i>s, amide</i> III                                | <i>trans</i> secondary amides                   |
|      | <i>s, p</i> N=N=N sym str                          | azides                                          |
|      | <i>s, CH</i> def                                   | <i>cis</i> (sat) CH=CH (sat)                    |
|      | <i>m, CC<sub>3</sub></i> vib                       | t-butyl groups                                  |
| 1340 | <i>s, C-N</i> amide III                            | <i>cis</i> form secondary amides                |
|      | <i>s-m, asym</i> N-C-N str                         | ureas                                           |
|      | <i>s, p</i> N=N=N sym str                          | azides                                          |
|      | <i>m-s, CH</i> in-plane rocking                    | aldehydes                                       |
|      | <i>m-s, p</i> sym CO <sub>2</sub> <sup>-</sup> str | carboxylate ions                                |
|      | <i>m-w, OH</i> def                                 | phenols                                         |
| 1381 | <i>s, CH</i> def                                   | <i>cis</i> (sat) CH=CH (sat)                    |
|      | <i>s, amide</i> III band                           | primary thioamides                              |
|      | <i>m-s, CH</i> in-plane rocking                    | aldehydes                                       |
|      | <i>m-s, p</i> sym CO <sub>2</sub> <sup>-</sup> str | aromatic acid salts and carboxylate ions        |
|      | <i>m-s, p</i> CH <sub>2</sub> def                  | vinyls-CH=CH <sub>2</sub>                       |
| 1434 | <i>s, amide</i> III                                | primary thioamides                              |
|      | <i>m-s, CH</i> in-plane rocking                    | aldehydes                                       |
|      | <i>m-s, p</i> CH <sub>2</sub> def                  | vinyls-CH=CH <sub>2</sub>                       |
|      | <i>m-w, OCH<sub>3</sub>, OCH<sub>2</sub></i> def   | -OCH <sub>3</sub> OCH <sub>2</sub> -            |
|      | <i>m-s, p</i> sym CO <sub>2</sub> <sup>-</sup> str | aromatic acid salts and carboxylate ions        |
| 1523 | <i>w, amide</i> III                                | ureas                                           |
|      | <i>w, NH</i> def                                   | secondary amines                                |
|      | <i>w, NH<sub>3</sub><sup>+</sup> sym</i> def       | -NH <sub>3</sub> <sup>+</sup>                   |
| 1557 | <i>w, amide</i> III                                | ureas                                           |

|      |                                                  |                                                                                          |
|------|--------------------------------------------------|------------------------------------------------------------------------------------------|
|      | <i>w</i> , NH def                                | secondary amines                                                                         |
|      | <i>s</i> , several bands ring C=C str            | benzene derivatives                                                                      |
| 1586 | <i>w</i> , NH <sub>2</sub> scissoring            | primary amines                                                                           |
|      | <i>m</i> , C=O str                               | enol from diketones                                                                      |
|      | <i>w</i> , NH <sub>3</sub> <sup>+</sup> asym str | -NH <sub>3</sub> <sup>+</sup>                                                            |
|      | <i>w</i> , CO <sub>2</sub> <sup>-</sup> asym str | aromatic acid salts                                                                      |
|      | <i>w</i> amide III band                          | ureas                                                                                    |
| 1632 | <i>s-m</i> , asym NO <sub>2</sub> str            | nitrates -ONO <sub>2</sub>                                                               |
|      | <i>s</i> , C=C str                               | C=C conjugated with C=C or C=O or with aryl and <i>cis</i> (unsat) -CH=CH-unsat          |
|      | <i>w-m</i> , amides II                           | primary amides                                                                           |
|      | <i>w</i> , NH <sub>2</sub> scissoring            | primary amines                                                                           |
|      | <i>m</i> , C=O str                               | enol from diketones                                                                      |
|      | <i>s</i> , several bands ring C=C str            | benzene derivatives                                                                      |
| 1665 | <i>w-m</i> , NH <sub>2</sub> def                 | primary amides                                                                           |
|      | <i>m-w</i> , amide I                             | Primary, secondary and tertiary amides                                                   |
|      | <i>m-s</i> , C=N str                             | imines =C=N-                                                                             |
|      | <i>s</i> , C=C str                               | =C=C-N                                                                                   |
|      | <i>s</i> , C=C str                               | <i>trans</i> (unsat)-CH=CH-(unsat)                                                       |
|      | <i>m-w</i> , C=O str                             | α,β unsat ketones                                                                        |
| 1698 | <i>w-m</i> , C=O str                             | α,β unsat Aliphatic carboxylic acids (as dimer), thiol acids, -COSH and secondary amides |
|      | <i>v</i> , C=O str                               | aryl aldehydes                                                                           |
|      | <i>w</i> , C=O str                               | α,β-unsat ketones <i>cis</i> form                                                        |
| 1739 | <i>m</i> , C=O str                               | Sat. aliphatic esters, ketones and aldehydes and cationic α-amino acids                  |
| 1763 | <i>m-w</i> , C=O str                             | γ-lactones (sat 5-membered ring)                                                         |
| 1797 | <i>m-w</i> , C=O str                             | β lactones (4-membered ring) and sat. aliphatic acid chlorides                           |
| 1815 | <i>m-w</i> , C=O str                             | β lactones (4-membered ring)                                                             |
| 1942 | <i>v</i> , asym C=C=C str                        | Allenes and asymmetrically disubstituted allenes >C=C=CH <sub>2</sub>                    |
| 1965 | <i>v</i> , asym C=C=C str                        | Allenes and monosubstituted allenes >C=C=CH <sub>2</sub>                                 |
| 2080 | <i>m-s</i> , <i>p</i> asym str                   | azides -N=N=N                                                                            |
| 2091 | <i>m-s</i> , <i>p</i> br, asym NCS str           | isothiocyanates -N=C=S                                                                   |
| 2183 | <i>m-s</i> , <i>p</i> asym str                   | azides -N=N=N                                                                            |
| 2212 | <i>s</i> , C=N str                               | aliphatic nitriles                                                                       |
|      | <i>m-s</i> , CN str                              | P-CN                                                                                     |
| 2336 | <i>m-w</i> , P-H str                             | P-H                                                                                      |
| 2380 | <i>m-w</i> , P-H str                             | P-H                                                                                      |
| 2452 | <i>m-w</i> , P-H str                             | P-H                                                                                      |
| 2470 | <i>m-w</i> , P-H str                             | P-H                                                                                      |
| 2567 | <i>s</i> , <i>p</i> S-H str                      | Mercaptans, aliphatic thiols, thiophenols and CH <sub>2</sub> SH                         |

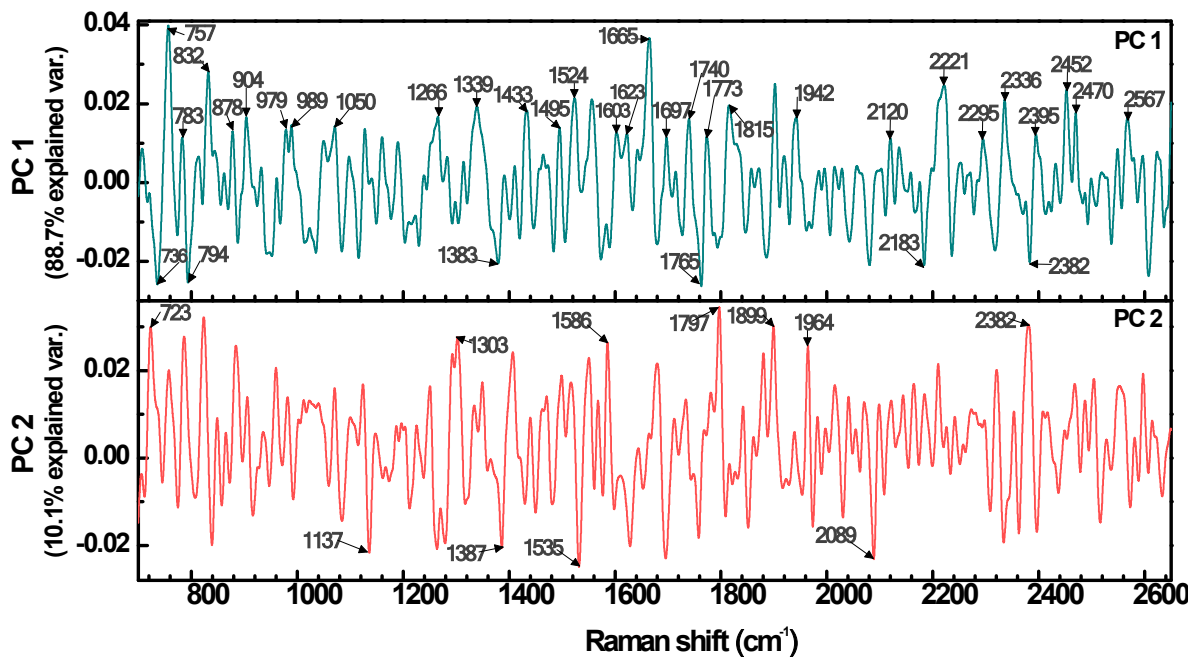

Fig. S4. The first and second principal components as given by PCA versus Raman shift when fd-cys-Au virus (nanowires-like) and fd-Au (AuNPs at the tip) SERS spectra are analyzed. Peaks with arrows correspond to the main differences between both spectra.

Table S3. Modes and functional groups assignment for the principal differences between fd-cys-Au (gold nanowire-like structures) and fd-Au (viruses with AuNPs at the tip) obtained with PCA and pointed out in Fig.S4.

| Raman shift (cm <sup>-1</sup> ) | Type of mode                               | Tentative functional groups assignment          |
|---------------------------------|--------------------------------------------|-------------------------------------------------|
| 723                             | <i>m-s, p</i> asym CSC str                 | CH <sub>3</sub> SCH <sub>2</sub> -              |
|                                 | <i>m, p</i> O-C=O in-plane def             | formates                                        |
|                                 | <i>s</i> , amide VII                       | primary thioamides                              |
|                                 | <i>m-s</i> , sym skeletal vib              | tertiary butyl groups                           |
|                                 | <i>s</i> , C-S str                         | aliphatic sulphides and disulphides             |
| 736                             | <i>m</i> , NO <sub>2</sub> def             | nitroamines >N-NO <sub>2</sub>                  |
|                                 | <i>m-s, p</i> asym CSC str                 | CH <sub>3</sub> SCH <sub>2</sub> -              |
|                                 | <i>m, p</i> O-C=O in-plane def             | formates                                        |
|                                 | <i>m-s</i> sym skeletal vib                | tertiary butyl groups                           |
|                                 | <i>s</i> , C-S str                         | aliphatic sulphides and disulphides             |
| 757                             | <i>s, p</i> asym CNC str                   | tertiary amides                                 |
|                                 | P=S str                                    | P=S                                             |
|                                 | <i>m, p</i> skeletal vib                   | branched alkanes                                |
|                                 | <i>m-s</i> , ring vib                      | <i>para</i> disubstituted benzenes              |
|                                 | <i>m, p</i> CCl str                        | saturated aliphatic acid chlorides              |
|                                 | <i>m-s</i> , sym skeletal vib              | tertiary butyl groups                           |
|                                 | <i>m-s, p</i> asym CSC str                 | CH <sub>3</sub> SCH <sub>2</sub> -              |
| 783                             | <i>s, p</i> asym CNC str                   | tertiary amides                                 |
|                                 | P=S str                                    | P=S                                             |
|                                 | POP str                                    | P-O-P                                           |
|                                 | <i>m, p</i> skeletal vib                   | branched alkanes                                |
|                                 | <i>m-s</i> , ring vib                      | <i>para</i> disubstituted benzenes              |
|                                 | <i>m-s</i> , CO def                        | tertiary alcohols                               |
|                                 | 794                                        | <i>m-s</i> , CO skeletal vib and CO def         |
| <i>s, p</i> asym CNC str        |                                            | tertiary amides                                 |
| POP str                         |                                            | P-O-P                                           |
| P=S str                         |                                            | P=S                                             |
| <i>m, p</i> skeletal vib        |                                            | branched alkanes                                |
| 832                             | <i>s, p</i> asym CNC str                   | tertiary amides                                 |
|                                 | POP str                                    | P-O-P                                           |
|                                 | P=S str                                    | P=S                                             |
|                                 | <i>m-s</i> , skeletal vib                  | Straight and branched chain alkanes             |
|                                 | <i>m-s</i> , sym COC str                   | Aliphatic and vinyl ethers                      |
|                                 | <i>s, p</i> CCO str                        | primary and secondary alcohols                  |
|                                 | <i>m-s</i> , ring vib                      | <i>para</i> disubstituted benzenes              |
| 878                             | <i>m-s, p</i> C-N str                      | saturated primary and secondary nitro compounds |
|                                 | <i>m</i> , CH def                          | <i>cis</i> CH=CH-                               |
|                                 | <i>m-s</i> , skeletal vib                  | straight chain alkanes                          |
|                                 | <i>s, p</i> CCO str                        | primary and secondary alcohols                  |
|                                 | <i>m-s</i> , sym COC str                   | aliphatic ethers                                |
| 904                             | <i>m-s, p</i> C-N str                      | saturated primary and secondary nitro compounds |
|                                 | <i>m</i> , CH def                          | <i>cis</i> CH=CH-                               |
| 979                             | <i>s</i> , ring vib                        | pyridines                                       |
|                                 | <i>m-s, p</i> C-N str                      | saturated primary and secondary nitro compounds |
|                                 | <i>m</i> , CH def                          | <i>trans</i> CH=CH- and <i>cis</i> CH=CH-       |
| 989                             | <i>m-s, p</i> C-N str                      | saturated primary and secondary nitro compounds |
|                                 | <i>m-s</i> , C=C, C=N str                  | pyrimidines                                     |
|                                 | <i>s</i> , ring vib                        | pyridines                                       |
|                                 | <i>m-w</i> , P-H def                       | P-H                                             |
|                                 | <i>m</i> , CH def                          | <i>trans</i> CH=CH- and <i>cis</i> CH=CH-       |
|                                 | <i>s</i> , CH <sub>2</sub> /CH wagging vib | cyclopropyl compounds                           |

|      |                                                  |                                          |
|------|--------------------------------------------------|------------------------------------------|
|      | <i>s, p</i> sym COC str                          | ethers                                   |
| 1050 | <i>m-s</i> , ring vib                            | 2-monosubstituted pyridines              |
|      | <i>m-s</i> , CCC str                             | straight chain alkanes                   |
|      | <i>s, p</i> CH in-plane def                      | orthodisubstituted benzenes              |
|      | <i>s, p</i> sym COC str                          | ethers                                   |
| 1071 | <i>m</i> , CO-C str                              | formates                                 |
|      | <i>w</i> , asym C-O-C str                        | saturated aliphatic amines and ethers    |
|      | <i>m-s</i> , CCC str                             | straight chain alkanes                   |
| 1128 | <i>s, p</i> sym C=C=C str                        | allenes                                  |
|      | <i>m-s</i> , C-N str                             | -CO, NH, NH <sub>2</sub>                 |
| 1137 | <i>s, p</i> sym COC str                          | ethers                                   |
|      | <i>m-w</i> , P-H def                             | P-H                                      |
|      | <i>w</i> , asym C-O-C str                        | saturated aliphatic amines               |
| 1160 | <i>s, p</i> sym COC str                          | ethers                                   |
|      | <i>m-s</i> , C-N str                             | Aliphatic amines                         |
| 1190 | <i>m-s</i> , C-N str                             | Aliphatic amines                         |
|      | <i>s</i> , CH def                                | <i>cis</i> (sat) CH=CH (sat)             |
|      | <i>m</i> , CC <sub>3</sub> vib                   | t-butyl groups                           |
|      | <i>m-s</i> , C-O-O str                           | formates                                 |
| 1266 | <i>s</i> , amide III                             | <i>trans</i> secondary amides            |
|      | <i>s, p</i> N=N=N sym str                        | azides                                   |
|      | <i>s</i> , CH def                                | <i>cis</i> (sat) CH=CH (sat)             |
|      | <i>m</i> , CC <sub>3</sub> vib                   | t-butyl groups                           |
| 1303 | <i>v</i> , asym SO <sub>2</sub> str              | sulphones                                |
|      | <i>w</i> , sym CH <sub>3</sub> def               | PCH <sub>3</sub>                         |
|      | <i>s, p</i> N=N=N sym str                        | azides                                   |
| 1339 | <i>s</i> , C-N amide III                         | <i>cis</i> form secondary amides         |
|      | <i>s-m</i> , asym N-C-N str                      | ureas                                    |
|      | <i>s, p</i> N=N=N sym str                        | azides                                   |
|      | <i>m-s</i> , CH in-plane rocking                 | aldehydes                                |
|      | <i>m-s</i> , <i>p</i> sym CO <sub>2</sub> - str  | carboxylate ions                         |
| 1383 | <i>s</i> , CH def                                | <i>cis</i> (sat) CH=CH (sat)             |
|      | <i>s</i> , amide III band                        | primary thioamides                       |
|      | <i>s, p</i> N=C=O sym str                        | isocyanates -N=C=O                       |
|      | <i>m-s</i> , CH in-plane rocking                 | aldehydes                                |
|      | <i>m-s</i> , <i>p</i> sym CO <sub>2</sub> - str  | aromatic acid salts and carboxylate ions |
|      | <i>m-s</i> , <i>p</i> CH <sub>2</sub> def        | vinyls-CH=CH <sub>2</sub>                |
| 1433 | <i>m-s</i> , CH in-plane rocking                 | aldehydes                                |
|      | <i>m-s</i> , <i>p</i> CH <sub>2</sub> def        | vinyls-CH=CH <sub>2</sub>                |
|      | <i>m-s</i> , <i>p</i> sym CO <sub>2</sub> - str  | aromatic acid salts and carboxylate ions |
| 1495 | <i>w</i> , NH def                                | secondary amines                         |
|      | <i>w</i> , NH <sub>3</sub> <sup>+</sup> sym def  | -NH <sub>3</sub> <sup>+</sup>            |
| 1524 | <i>w</i> , amide III                             | ureas                                    |
|      | <i>w</i> , NH <sub>3</sub> <sup>+</sup> sym def  | -NH <sub>3</sub> <sup>+</sup>            |
| 1535 | <i>m-s</i> , <i>p</i> sym CO <sub>2</sub> - str  | aromatic acid salts                      |
|      | <i>w</i> , amide III band                        | ureas                                    |
|      | <i>w</i> , NH def                                | secondary amines                         |
|      | <i>m-w</i> , asym NO <sub>2</sub> str            | aromatic nitro compounds                 |
| 1556 | <i>w</i> , NH def                                | secondary amines                         |
|      | <i>w</i> , amide III                             | ureas                                    |
|      | <i>s</i> , several bands ring C=C str            | benzene derivatives                      |
|      | <i>w</i> , NH <sub>2</sub> scissoring            | primary amines                           |
| 1586 | <i>m</i> , C=O str                               | enol from diketones                      |
|      | <i>w</i> , NH <sub>3</sub> <sup>+</sup> asym str | -NH <sub>3</sub> <sup>+</sup>            |
|      | <i>w</i> , CO <sub>2</sub> - asym str            | aromatic acid salts                      |
|      | <i>w</i> , NH <sub>2</sub> scissoring            | primary amines                           |
| 1603 | <i>w</i> , NH <sub>3</sub> <sup>+</sup> asym str | -NH <sub>3</sub> <sup>+</sup>            |
|      | <i>s</i> , C=C str                               | C=C conjugated with C=C or C=O           |
|      | <i>s</i> , several bands ring C=C str            | benzene derivatives                      |

|      |                                                  |                                                                                                                                                                              |
|------|--------------------------------------------------|------------------------------------------------------------------------------------------------------------------------------------------------------------------------------|
|      | <i>m</i> , C=O str                               | enol from diketones                                                                                                                                                          |
| 1623 | <i>w-m</i> , amides II                           | primary amides                                                                                                                                                               |
|      | <i>w</i> , NH <sub>2</sub> scissoring            | primary amines                                                                                                                                                               |
|      | <i>w</i> , NH <sub>3</sub> <sup>+</sup> asym str | -NH <sub>3</sub> <sup>+</sup>                                                                                                                                                |
|      | <i>s</i> , C=C str                               | C=C conjugated with C=C, C=O or with aryl                                                                                                                                    |
|      | <i>m</i> , C=O str                               | enol from diketones                                                                                                                                                          |
| 1665 | <i>m-w</i> , amide I band                        | Primary, secondary and tertiary amides                                                                                                                                       |
|      | <i>w-m</i> , NH <sub>2</sub> def                 | primary amides                                                                                                                                                               |
|      | <i>s, p</i> C=C str                              | =C=CH- and =C=C-N                                                                                                                                                            |
|      | <i>m-w</i> , C=O str                             | α,β unsat ketones and ureas                                                                                                                                                  |
| 1697 | <i>w-m</i> , C=O str                             | α,β unsat. Aliphatic carboxylic acids (as dimer), aryl aldehydes, α,β-unsat ketones <i>s-cis</i> form and α,β-unsat dicarboxylic acids, thiol acids, -COSH, secondary amides |
| 1740 | <i>m</i> , C=O str                               | sat aliphatic esters, ketones and aldehydes and cationic α-amino acids (aq. sln.)                                                                                            |
| 1765 | <i>m-w, p</i> C=O str                            | aryl and a,b-unsat acid chlorides                                                                                                                                            |
|      | <i>m-w</i> , C=O str                             | γ-lactones (sat 5-membered ring)                                                                                                                                             |
| 1773 | <i>m-w</i> , C=O str                             | γ-lactones (sat 5-membered ring)                                                                                                                                             |
| 1797 | <i>m-w</i> , C=O str                             | β lactones (4-membered ring)                                                                                                                                                 |
|      | <i>m-w, p</i> C=O str                            | sat. Aliphatic acid chlorides                                                                                                                                                |
| 1815 | <i>m-w</i> , C=O str                             | β lactones (4-membered ring)                                                                                                                                                 |
|      | <i>m-w, p</i> C=O str                            | sat. aliphatic acid chlorides                                                                                                                                                |
| 1942 | <i>v</i> , asym C=C=C str                        | Allenes and asymmetrically disubstituted allenes =C=C=CH <sub>2</sub>                                                                                                        |
| 1964 | <i>v</i> , asym C=C=C str                        | allenes and monosubstituted allenes >C=C=CH <sub>2</sub>                                                                                                                     |
| 2089 | <i>m-s, p</i> asym str                           | azides -N=N=N                                                                                                                                                                |
| 2120 | <i>v</i> , asym -N=C=C str                       | Ketenimines >C=N=N-                                                                                                                                                          |
|      | <i>m-s, p</i> asym str                           | azides -N=N=N                                                                                                                                                                |
| 2183 | <i>m-s, p</i> asym str                           | azides -N=N=N                                                                                                                                                                |
| 2221 | <i>s</i> , C=N str                               | aliphatic nitriles                                                                                                                                                           |
|      | <i>m-s</i> , CN str                              | P-CN                                                                                                                                                                         |
| 2295 | <i>m-w</i> , P-H str                             | P-H                                                                                                                                                                          |
| 2336 | <i>m-w</i> , P-H str                             | P-H                                                                                                                                                                          |
| 2382 | <i>m-w</i> , P-H str                             | P-H                                                                                                                                                                          |
| 2395 | <i>m-w</i> , P-H str                             | P-H                                                                                                                                                                          |
| 2452 | <i>m-w</i> , P-H str                             | P-H                                                                                                                                                                          |
| 2470 | <i>m-w</i> , P-H str                             | P-H                                                                                                                                                                          |
| 2567 | <i>s, p</i> S-H str                              | Mercaptans, aliphatic thiols, thiophenols and CH <sub>2</sub> SH                                                                                                             |

## References

- (1) Socrates, G. *Infrared and Raman Characteristic Group Frequencies: Tables and Charts*; 3rd ed.; John Wiley and Sons Ltd: England, 2001; p. 366.
